# Supplementary material for: Reversing Synchronized Brain Circuits Using Targeted Auditory-Somatosensory Stimulation to Treat Phantom Percepts: A Randomized Clinical Trial
Source: PubMed Central journal article supplement (PMC10238951; doi:10.1001/jamanetworkopen.2023.15914), 2023-06-02
Supplement: jamanetwopen-e2315914-s001.pdf [file jamanetwopen-e2315914-s001.pdf]

## Supplemental Online Content

Jones GR, Martel DT, Riffle TL, et al. Reversing synchronized brain circuits using targeted auditory-somatosensory stimulation to treat phantom percepts: a randomized clinical trial. *JAMA Netw Open*. 2023;6(6):e2315914.  
doi:10.1001/jamanetworkopen.2023.15914

**eFigure 1.** Simplified DCN Circuit Demonstrating Multimodal Integration

**eFigure 2.** Bisensory Treatment Device and Stimuli

**eFigure 3.** Treatment Group Characteristics Were Not Different at Baseline

**eFigure 4.** Overall TFI Scores Decrease Cumulatively Over 6 Weeks of Bi-Sensory Treatment and Continue Into Washout Period

**eFigure 5.** Loudness Decreased Cumulatively Over 6 Weeks of Bi-Sensory Treatment and Continued to Decrease in the Washout Period But Was Minimal During Sound-Alone Control Treatment

**eFigure 6.** Changes in Loudness and TFI Scores Were Significantly Correlated During the Active Treatment (Pearson's Linear Correlation;  $r[ITT]=0.136$ ,  $P=3e-3$ ;  $r[PP]=0.165$ ,  $P=2e-3$ ) But Not During the Control Treatment

**eFigure 7.** Reduction in TFI Significantly Correlates With Number of Somatic Maneuvers Eliciting Any Change in Tinnitus During Active Treatment (Pearson's Linear Correlation;  $r(ITT)=0.292$ ,  $P=1.09e-2$ ;  $r(PP)=0.33$ ,  $P=1.02e-2$ ), But Not Control or Either Washout Times

**eTable 1.** Demographics Table

**eTable 2.** Inclusion/Exclusion Criteria and Counts

**eTable 3.** Somatic Tinnitus Modulation Checklist

**eTable 4.** Rationale for Subject Withdrawal from Study

**eTable 5.** Rate of Adverse Events (AEs) Were Not Significantly Different Between Active vs Sham

This supplemental material has been provided by the authors to give readers additional information about their work.

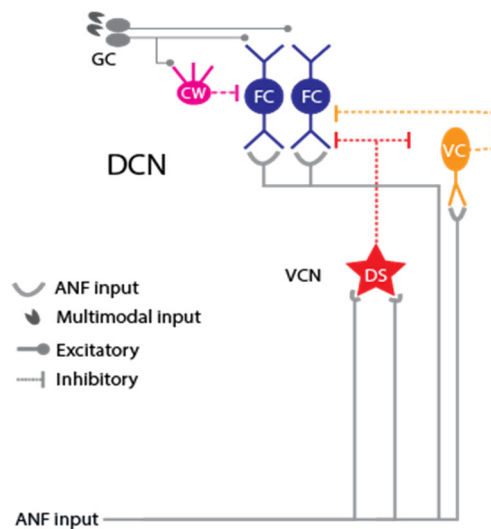

**eFigure 1.** Simplified DCN circuit demonstrating multimodal integration.

*Multimodal input from somatosensory and other systems project to cochlear granule cells (GC). Granule cell axons, in turn, project to fusiform cell (FC) and cartwheel cell (CWC) apical dendrites, forming plastic synapses. Auditory nerve fibers (ANF) project to FC basal dendrites forming non-plastic synapses. FCs receive inhibitory input from D-Stellate (DS), vertical cells (VS) and CWCs.*

### Blinding and Randomization

Participants were randomly assigned to Group 1 (N=49; active first, then control) or Group 2 (N=50; control first, then active), in a 1:1 proportion for a balanced study design. The random number list was precomputed prior to the start of the study with a fixed, secret seed value (*randsample*; Mathworks, MATLAB statistics toolbox; Mersenne Twister algorithm). The seed value and subject assignment were then encrypted and only decrypted *in silico*. To verify each device's programmed state without breaking the blinding, each subject's enrollment number was associated with a unique 4-digit identifier derived from the initial programmed state and the subject's index in the randomization list. Successful programming was indicated by checking the equivalence of the 4-digit ID computed independently by at least two computers.

### Intervention Implementation

The treatment device is shown in **eFigure 2a**. To generate a personalized auditory stimulus audiograms were converted from dB HL to dB SPL, zero-padded at frequency components outside of 200 Hz to 14 kHz, resampled, interpolated and smoothed at evenly spaced frequencies from 0 Hz to 24 kHz in 100 Hz steps. A subject's tinnitus likeness spectrum was assessed by having subjects titrate their tinnitus similarly (0-100 visual analogue Likert-scale) to a series of 11 iso-intensity sounds. Each sound was compared 3 times, with the resulting spectrum scaled to the SPL intensity used for the likeness test. The treatment spectrum (**eFigure 2B**) consisted of the tinnitus spectrum scaled to 40 dB SL above the audiogram spectrum and limited to an output no greater

than 90 dB SPL at any frequency. The auditory spectrum was then converted into a time-domain signal using the Inverse Fast Fourier Transform (**eFigure 2C**). Sound stimuli were 10 ms in duration, 1 ms  $\cos^2$  rise/fall time (MathWorks MATLAB Signal Processing Toolbox). The auditory stimulus was combined with the somatosensory stimulus using the interstimulus timing interval previously shown to suppress tinnitus in animals and humans (US PTO #3A9242067; Marks et al., 2018)

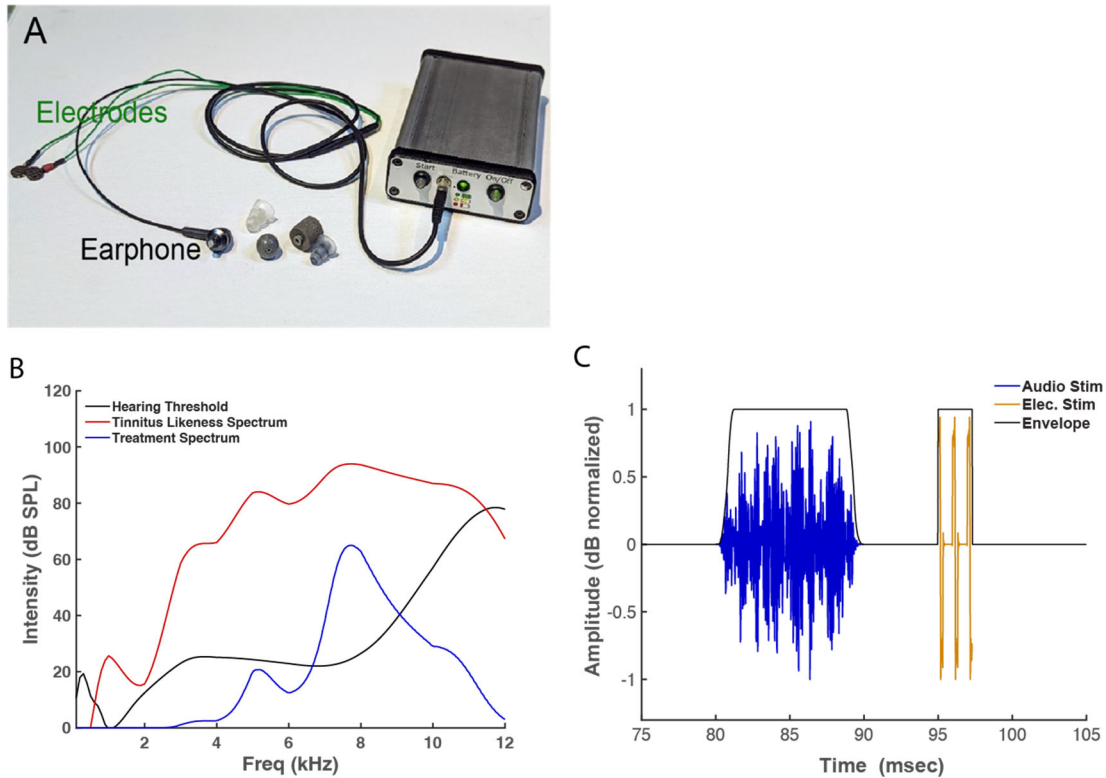

**eFigure 2.** Bisensory treatment device and stimuli.

**A.** The take-home device is displayed with electrical leads (green) and audio lead (black). **B.** Personalized treatment spectrum example (blue) is calculated as a subject's tinnitus likeness (red) set at 40 dB above the subject's hearing threshold (black) in dB SPL. **C.** Treatment stimulus: Sample stimulus waveform is shown for one bisensory auditory-somatosensory stimulus.

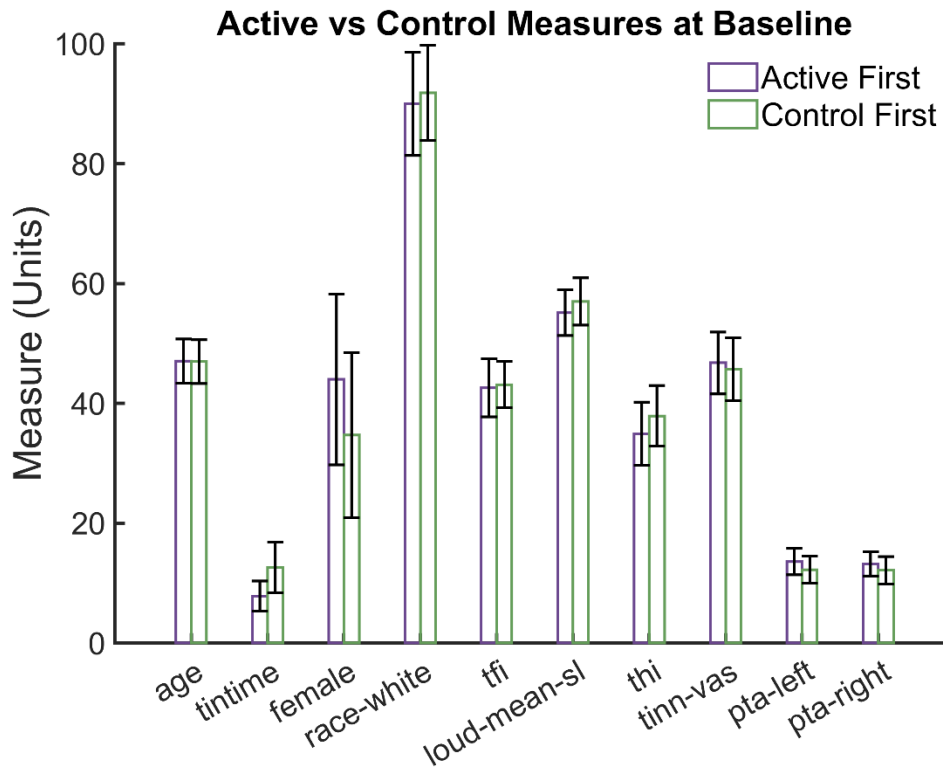

**eFigure 3.** Treatment group characteristics were not different at baseline.

Subjects (N=99) receiving bi-sensory-first (purple) vs control-first (green) were not significantly different for: age (years), tinnitus duration (years), female-identifying (%), white-race (%), TFI (points), TinnTester mean loudness (dB SL), THI (points), TinnTester VAS loudness (points), or left ear & right ear PTA threshold (dB SPL) (data shown: mean +/- 95% CI;  $p > 0.05$  between groups for all measures).

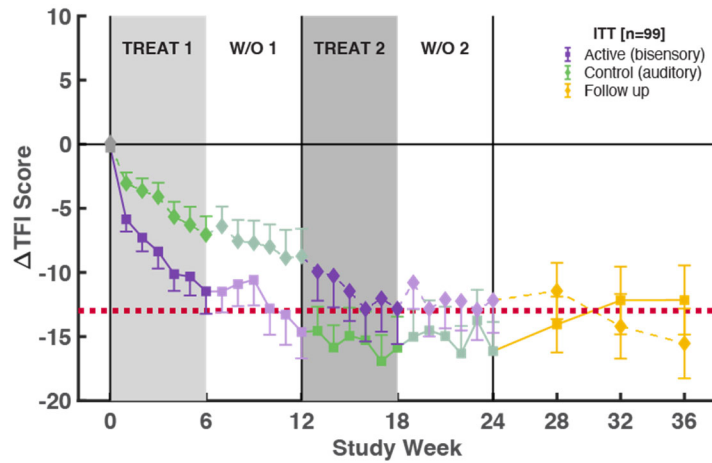

**eFigure 4.** Overall TFI scores decrease cumulatively over 6 weeks of bi-sensory treatment and continue into washout period.

*Reduction in TFI during bi-sensory treatment and washout periods are significantly greater than decreases during the control, sound alone treatment and washout periods. Change in TFI shown for ITT group.*

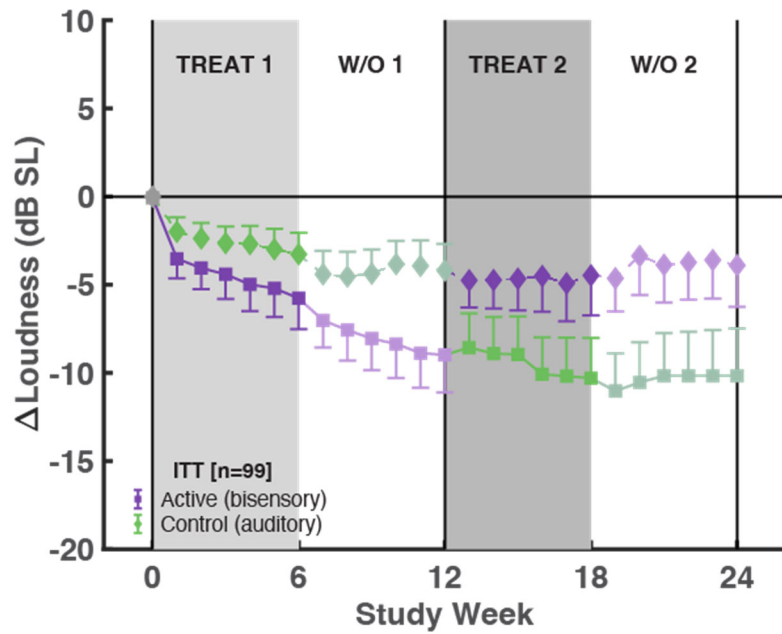

**eFigure 5.** Loudness decreased cumulatively over 6 weeks of bi-sensory treatment and continued to decrease in the washout period but was minimal during sound-alone control treatment.

*Results are shown for ITT group.*

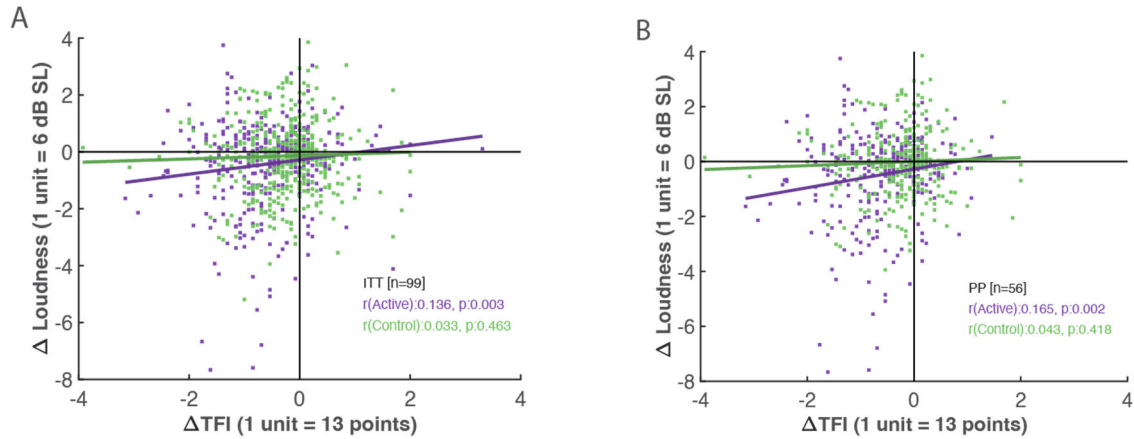

**eFigure 6.** Changes in Loudness and TFI scores were significantly correlated during the active treatment (Pearson's linear correlation;  $r$ [ITT]=0.136,  $p=3e-3$ ;  $r$ [PP]=0.165,  $p=2e-3$ ) but not during the control treatment.

**A) and B)** show ITT and PP, respectively. The units displayed on this figure represent a clinically meaningful change in TFI Score (13 points) and a decrease in perceived loudness by half (6 dB).



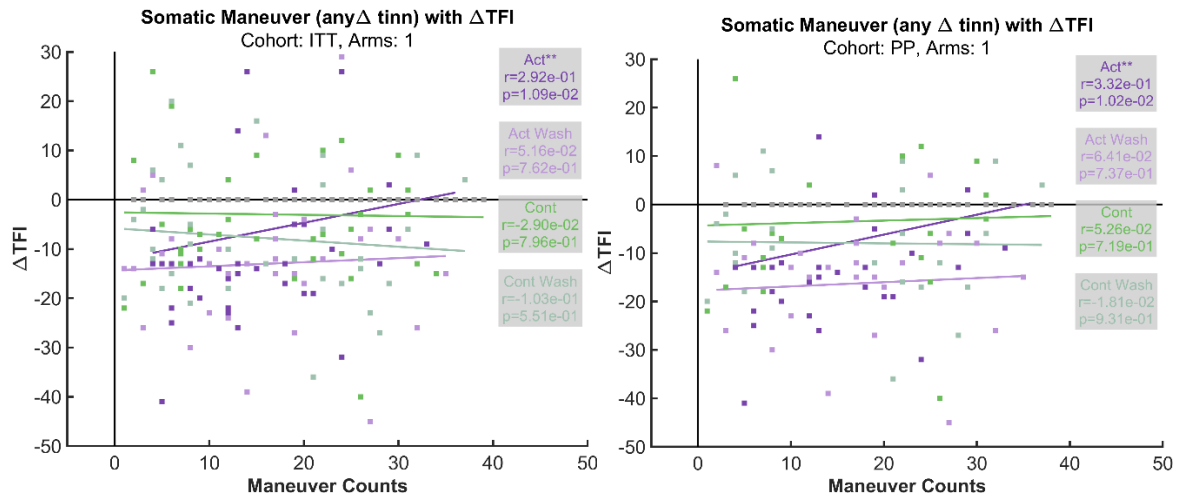

**eFigure 7.** Reduction in TFI significantly correlates with number of somatic maneuvers eliciting any change in tinnitus during active treatment (Pearson's linear correlation;  $r(\text{ITT})=0.292$ ,  $p=1.09\text{e-}2$ ;  $r(\text{PP})=0.33$ ,  $p=1.02\text{e-}2$ ), but not control or either washout times.

**A) ITT and B) PP cohorts, respectively.**

**eTable 1.** Demographics Table.

*Subjects in the present study had a similar demographic profile to the population of US tinnitus sufferers ((NCHS), 2011-2020).*

| <b>Characteristic</b>                      | <b>Measure/Statistic</b>                         | <b>Study Population</b> | <b>US Tinnitus Population</b> |
|--------------------------------------------|--------------------------------------------------|-------------------------|-------------------------------|
| <b>Hearing Loss (dB HL)</b>                | <b>Pure Tone Average (Std. Dev.)</b>             | 9.8 ± 7.8 dB            | 13.1 ±8.6 dB                  |
| <b>Hearing Loss High Frequency (dB HL)</b> | <b>Pure Tone Average, &gt;= 4kHz (Std. Dev.)</b> | 25.5 ± 14.9 dB          | 28.0 ±14.6 dB                 |
| <b>Age</b>                                 | <b>Mean (Std. Dev.)</b>                          | 47 (12.7) years         | 54.7 (19.3) years             |
|                                            | <b>&gt;=40 years</b>                             | 63%                     | 76%                           |
| <b>Sex</b>                                 | <b>% Male</b>                                    | 60%                     | 50.8%                         |
| <b>Race/Ethnicity</b>                      | <b>% White, non-Hispanic</b>                     | 86%                     | 46%                           |

**eTable 2.** Inclusion/exclusion criteria and counts.

| Inclusion | Failures | Description                                                                                                                                                                                                                                                                                                                                                                                                                                                                                                                                                                                    |
|-----------|----------|------------------------------------------------------------------------------------------------------------------------------------------------------------------------------------------------------------------------------------------------------------------------------------------------------------------------------------------------------------------------------------------------------------------------------------------------------------------------------------------------------------------------------------------------------------------------------------------------|
| 1         | 0        | Must be 18 years of age or older                                                                                                                                                                                                                                                                                                                                                                                                                                                                                                                                                               |
| 2         | 11       | A score of >17 points on the Tinnitus Functional Index (TFI), as measured at the screening visit                                                                                                                                                                                                                                                                                                                                                                                                                                                                                               |
| 3         | 5        | Must report constant, subjective, preferably unilateral tinnitus without any active external or middle ear pathology                                                                                                                                                                                                                                                                                                                                                                                                                                                                           |
| 4         | 127      | No greater than a moderate hearing loss at the tinnitus frequencies ( $\leq 55$ dB HL) and no greater than a moderate hearing loss ( $\leq 50$ dB HL) from 125 – 6,000 Hz                                                                                                                                                                                                                                                                                                                                                                                                                      |
| 5         | 19       | Must be able to modulate their tinnitus with a somatic maneuver (Simmons et al., 2008)                                                                                                                                                                                                                                                                                                                                                                                                                                                                                                         |
| 6         | 0        | Preferably onset of tinnitus less than one year ago, but present for at least 6 months. Tinnitus should be bothersome ( $\geq 17$ points, THI)                                                                                                                                                                                                                                                                                                                                                                                                                                                 |
| 7         | 0        | Absence of retrocochlear pathology                                                                                                                                                                                                                                                                                                                                                                                                                                                                                                                                                             |
| 8         | 7        | No participation in a tinnitus treatment regimen within the past six months or participation in the University of Michigan pilot clinical trial                                                                                                                                                                                                                                                                                                                                                                                                                                                |
| 9         | 2        | Resides within 100 miles of the study site                                                                                                                                                                                                                                                                                                                                                                                                                                                                                                                                                     |
| 10        | 33       | Withdrew Consent / Lost to follow-up                                                                                                                                                                                                                                                                                                                                                                                                                                                                                                                                                           |
| Exclusion | Failures | Description                                                                                                                                                                                                                                                                                                                                                                                                                                                                                                                                                                                    |
| 1         | 0        | Anyone not meeting the above inclusion criteria, and in addition:                                                                                                                                                                                                                                                                                                                                                                                                                                                                                                                              |
| 2         | 0        | Diagnosis of Meniere's disease                                                                                                                                                                                                                                                                                                                                                                                                                                                                                                                                                                 |
| 3         | 1        | Diagnosis of Semicircular Canal Dehiscence                                                                                                                                                                                                                                                                                                                                                                                                                                                                                                                                                     |
| 4         | 0        | Unilateral or bilateral cochlear implant recipients                                                                                                                                                                                                                                                                                                                                                                                                                                                                                                                                            |
| 5         | 0        | Diagnosis of acoustic neuroma                                                                                                                                                                                                                                                                                                                                                                                                                                                                                                                                                                  |
| 6         | 7        | Reports their tinnitus is pulsating                                                                                                                                                                                                                                                                                                                                                                                                                                                                                                                                                            |
| 7         | 0        | Evidence of retrocochlear disease                                                                                                                                                                                                                                                                                                                                                                                                                                                                                                                                                              |
| 8         | 6        | Patients with any indwelling electronic stimulation devices                                                                                                                                                                                                                                                                                                                                                                                                                                                                                                                                    |
| 9         | 3        | Current or previous use of any acoustic hearing aid or over the counter personal sound amplification product (PSAP) in the last 6 months                                                                                                                                                                                                                                                                                                                                                                                                                                                       |
| 10        | 13       | Current or former use of any of the following medications within the past 6 months: high dose aspirin ( $>325$ mg/day), high dose NSAIDs ( $>800$ mg/day), narcotics (any opioids), lithium, clonazepam, oxazepam, cholinergic medications (anti-dementia medications), anti-depressant medications (serotonin specific reuptake inhibitors; SSRIs, tri-cyclic anti-depressants; TCAs); anti-seizure/convulsant medications (Depakote), anti-psychotic medications (Haldol, Seroquel), Ototoxic medications, other chemotherapy agents, benzodiazepines, and central nervous system stimulants |
| 11        | 0        | Current diagnoses of any of the following: obsessive compulsive disorder (OCD), schizophrenia, bipolar disorder, extreme generalized anxiety disorder, drug/alcohol dependence                                                                                                                                                                                                                                                                                                                                                                                                                 |
| 12        | 0        | Pregnant or nursing.                                                                                                                                                                                                                                                                                                                                                                                                                                                                                                                                                                           |

**eTable 3.** Somatic Tinnitus Modulation Checklist.

|                  |                                          | <b>Tinnitus Modulation Maneuver Checklist</b> |                            |                            |                            |                            |                            |                            |                            |                            |                             |
|------------------|------------------------------------------|-----------------------------------------------|----------------------------|----------------------------|----------------------------|----------------------------|----------------------------|----------------------------|----------------------------|----------------------------|-----------------------------|
|                  |                                          | Significantly Better                          |                            | Mildly Better              |                            | No Change                  |                            | Mildly Worse               |                            | Significantly Worse        |                             |
| CN III, IV, & VI | Left Gaze                                | <input type="checkbox"/> 1                    | <input type="checkbox"/> 2 | <input type="checkbox"/> 3 | <input type="checkbox"/> 4 | <input type="checkbox"/> 5 | <input type="checkbox"/> 6 | <input type="checkbox"/> 7 | <input type="checkbox"/> 8 | <input type="checkbox"/> 9 | <input type="checkbox"/> 10 |
|                  | Right Gaze                               | <input type="checkbox"/> 1                    | <input type="checkbox"/> 2 | <input type="checkbox"/> 3 | <input type="checkbox"/> 4 | <input type="checkbox"/> 5 | <input type="checkbox"/> 6 | <input type="checkbox"/> 7 | <input type="checkbox"/> 8 | <input type="checkbox"/> 9 | <input type="checkbox"/> 10 |
|                  | Up Gaze                                  | <input type="checkbox"/> 1                    | <input type="checkbox"/> 2 | <input type="checkbox"/> 3 | <input type="checkbox"/> 4 | <input type="checkbox"/> 5 | <input type="checkbox"/> 6 | <input type="checkbox"/> 7 | <input type="checkbox"/> 8 | <input type="checkbox"/> 9 | <input type="checkbox"/> 10 |
|                  | Down Gaze                                | <input type="checkbox"/> 1                    | <input type="checkbox"/> 2 | <input type="checkbox"/> 3 | <input type="checkbox"/> 4 | <input type="checkbox"/> 5 | <input type="checkbox"/> 6 | <input type="checkbox"/> 7 | <input type="checkbox"/> 8 | <input type="checkbox"/> 9 | <input type="checkbox"/> 10 |
|                  | Up-right Gaze                            | <input type="checkbox"/> 1                    | <input type="checkbox"/> 2 | <input type="checkbox"/> 3 | <input type="checkbox"/> 4 | <input type="checkbox"/> 5 | <input type="checkbox"/> 6 | <input type="checkbox"/> 7 | <input type="checkbox"/> 8 | <input type="checkbox"/> 9 | <input type="checkbox"/> 10 |
|                  | Up-left Gaze                             | <input type="checkbox"/> 1                    | <input type="checkbox"/> 2 | <input type="checkbox"/> 3 | <input type="checkbox"/> 4 | <input type="checkbox"/> 5 | <input type="checkbox"/> 6 | <input type="checkbox"/> 7 | <input type="checkbox"/> 8 | <input type="checkbox"/> 9 | <input type="checkbox"/> 10 |
|                  | Down-right Gaze                          | <input type="checkbox"/> 1                    | <input type="checkbox"/> 2 | <input type="checkbox"/> 3 | <input type="checkbox"/> 4 | <input type="checkbox"/> 5 | <input type="checkbox"/> 6 | <input type="checkbox"/> 7 | <input type="checkbox"/> 8 | <input type="checkbox"/> 9 | <input type="checkbox"/> 10 |
|                  | Down-left Gaze                           | <input type="checkbox"/> 1                    | <input type="checkbox"/> 2 | <input type="checkbox"/> 3 | <input type="checkbox"/> 4 | <input type="checkbox"/> 5 | <input type="checkbox"/> 6 | <input type="checkbox"/> 7 | <input type="checkbox"/> 8 | <input type="checkbox"/> 9 | <input type="checkbox"/> 10 |
| CN V             | Jaw Clench Bilateral                     | <input type="checkbox"/> 1                    | <input type="checkbox"/> 2 | <input type="checkbox"/> 3 | <input type="checkbox"/> 4 | <input type="checkbox"/> 5 | <input type="checkbox"/> 6 | <input type="checkbox"/> 7 | <input type="checkbox"/> 8 | <input type="checkbox"/> 9 | <input type="checkbox"/> 10 |
|                  | Jaw Clench Left                          | <input type="checkbox"/> 1                    | <input type="checkbox"/> 2 | <input type="checkbox"/> 3 | <input type="checkbox"/> 4 | <input type="checkbox"/> 5 | <input type="checkbox"/> 6 | <input type="checkbox"/> 7 | <input type="checkbox"/> 8 | <input type="checkbox"/> 9 | <input type="checkbox"/> 10 |
|                  | Jaw Clench Right                         | <input type="checkbox"/> 1                    | <input type="checkbox"/> 2 | <input type="checkbox"/> 3 | <input type="checkbox"/> 4 | <input type="checkbox"/> 5 | <input type="checkbox"/> 6 | <input type="checkbox"/> 7 | <input type="checkbox"/> 8 | <input type="checkbox"/> 9 | <input type="checkbox"/> 10 |
| CN VII           | Eyebrow Raise                            | <input type="checkbox"/> 1                    | <input type="checkbox"/> 2 | <input type="checkbox"/> 3 | <input type="checkbox"/> 4 | <input type="checkbox"/> 5 | <input type="checkbox"/> 6 | <input type="checkbox"/> 7 | <input type="checkbox"/> 8 | <input type="checkbox"/> 9 | <input type="checkbox"/> 10 |
|                  | Tight Eyelid Closure                     | <input type="checkbox"/> 1                    | <input type="checkbox"/> 2 | <input type="checkbox"/> 3 | <input type="checkbox"/> 4 | <input type="checkbox"/> 5 | <input type="checkbox"/> 6 | <input type="checkbox"/> 7 | <input type="checkbox"/> 8 | <input type="checkbox"/> 9 | <input type="checkbox"/> 10 |
|                  | Wide Smile                               | <input type="checkbox"/> 1                    | <input type="checkbox"/> 2 | <input type="checkbox"/> 3 | <input type="checkbox"/> 4 | <input type="checkbox"/> 5 | <input type="checkbox"/> 6 | <input type="checkbox"/> 7 | <input type="checkbox"/> 8 | <input type="checkbox"/> 9 | <input type="checkbox"/> 10 |
|                  | Lip Purse                                | <input type="checkbox"/> 1                    | <input type="checkbox"/> 2 | <input type="checkbox"/> 3 | <input type="checkbox"/> 4 | <input type="checkbox"/> 5 | <input type="checkbox"/> 6 | <input type="checkbox"/> 7 | <input type="checkbox"/> 8 | <input type="checkbox"/> 9 | <input type="checkbox"/> 10 |
|                  | Cheek Blow                               | <input type="checkbox"/> 1                    | <input type="checkbox"/> 2 | <input type="checkbox"/> 3 | <input type="checkbox"/> 4 | <input type="checkbox"/> 5 | <input type="checkbox"/> 6 | <input type="checkbox"/> 7 | <input type="checkbox"/> 8 | <input type="checkbox"/> 9 | <input type="checkbox"/> 10 |
| CN XI            | Neck Flexion (Passive)                   | <input type="checkbox"/> 1                    | <input type="checkbox"/> 2 | <input type="checkbox"/> 3 | <input type="checkbox"/> 4 | <input type="checkbox"/> 5 | <input type="checkbox"/> 6 | <input type="checkbox"/> 7 | <input type="checkbox"/> 8 | <input type="checkbox"/> 9 | <input type="checkbox"/> 10 |
|                  | Neck Flexion (Active)                    | <input type="checkbox"/> 1                    | <input type="checkbox"/> 2 | <input type="checkbox"/> 3 | <input type="checkbox"/> 4 | <input type="checkbox"/> 5 | <input type="checkbox"/> 6 | <input type="checkbox"/> 7 | <input type="checkbox"/> 8 | <input type="checkbox"/> 9 | <input type="checkbox"/> 10 |
|                  | Neck Flexion (Active w/ Resistance)      | <input type="checkbox"/> 1                    | <input type="checkbox"/> 2 | <input type="checkbox"/> 3 | <input type="checkbox"/> 4 | <input type="checkbox"/> 5 | <input type="checkbox"/> 6 | <input type="checkbox"/> 7 | <input type="checkbox"/> 8 | <input type="checkbox"/> 9 | <input type="checkbox"/> 10 |
|                  | Neck Extension (Passive)                 | <input type="checkbox"/> 1                    | <input type="checkbox"/> 2 | <input type="checkbox"/> 3 | <input type="checkbox"/> 4 | <input type="checkbox"/> 5 | <input type="checkbox"/> 6 | <input type="checkbox"/> 7 | <input type="checkbox"/> 8 | <input type="checkbox"/> 9 | <input type="checkbox"/> 10 |
|                  | Neck Extension (Active)                  | <input type="checkbox"/> 1                    | <input type="checkbox"/> 2 | <input type="checkbox"/> 3 | <input type="checkbox"/> 4 | <input type="checkbox"/> 5 | <input type="checkbox"/> 6 | <input type="checkbox"/> 7 | <input type="checkbox"/> 8 | <input type="checkbox"/> 9 | <input type="checkbox"/> 10 |
|                  | Neck Extension (Active w/ Resistance)    | <input type="checkbox"/> 1                    | <input type="checkbox"/> 2 | <input type="checkbox"/> 3 | <input type="checkbox"/> 4 | <input type="checkbox"/> 5 | <input type="checkbox"/> 6 | <input type="checkbox"/> 7 | <input type="checkbox"/> 8 | <input type="checkbox"/> 9 | <input type="checkbox"/> 10 |
|                  | Left Lat. Flexion (Passive)              | <input type="checkbox"/> 1                    | <input type="checkbox"/> 2 | <input type="checkbox"/> 3 | <input type="checkbox"/> 4 | <input type="checkbox"/> 5 | <input type="checkbox"/> 6 | <input type="checkbox"/> 7 | <input type="checkbox"/> 8 | <input type="checkbox"/> 9 | <input type="checkbox"/> 10 |
|                  | Left Lat. Flexion (Active)               | <input type="checkbox"/> 1                    | <input type="checkbox"/> 2 | <input type="checkbox"/> 3 | <input type="checkbox"/> 4 | <input type="checkbox"/> 5 | <input type="checkbox"/> 6 | <input type="checkbox"/> 7 | <input type="checkbox"/> 8 | <input type="checkbox"/> 9 | <input type="checkbox"/> 10 |
|                  | Left Lat. Flexion (Active w/ Resistance) | <input type="checkbox"/> 1                    | <input type="checkbox"/> 2 | <input type="checkbox"/> 3 | <input type="checkbox"/> 4 | <input type="checkbox"/> 5 | <input type="checkbox"/> 6 | <input type="checkbox"/> 7 | <input type="checkbox"/> 8 | <input type="checkbox"/> 9 | <input type="checkbox"/> 10 |
|                  | Right Lat. Flexion (Passive)             | <input type="checkbox"/> 1                    | <input type="checkbox"/> 2 | <input type="checkbox"/> 3 | <input type="checkbox"/> 4 | <input type="checkbox"/> 5 | <input type="checkbox"/> 6 | <input type="checkbox"/> 7 | <input type="checkbox"/> 8 | <input type="checkbox"/> 9 | <input type="checkbox"/> 10 |
|                  | Right Lat. Flexion (Active)              | <input type="checkbox"/> 1                    | <input type="checkbox"/> 2 | <input type="checkbox"/> 3 | <input type="checkbox"/> 4 | <input type="checkbox"/> 5 | <input type="checkbox"/> 6 | <input type="checkbox"/> 7 | <input type="checkbox"/> 8 | <input type="checkbox"/> 9 | <input type="checkbox"/> 10 |
|                  | Right Lat. Flexion (Active w/Resistance) | <input type="checkbox"/> 1                    | <input type="checkbox"/> 2 | <input type="checkbox"/> 3 | <input type="checkbox"/> 4 | <input type="checkbox"/> 5 | <input type="checkbox"/> 6 | <input type="checkbox"/> 7 | <input type="checkbox"/> 8 | <input type="checkbox"/> 9 | <input type="checkbox"/> 10 |
|                  | Left Rotation (Passive)                  | <input type="checkbox"/> 1                    | <input type="checkbox"/> 2 | <input type="checkbox"/> 3 | <input type="checkbox"/> 4 | <input type="checkbox"/> 5 | <input type="checkbox"/> 6 | <input type="checkbox"/> 7 | <input type="checkbox"/> 8 | <input type="checkbox"/> 9 | <input type="checkbox"/> 10 |
|                  | Left Rotation (Active )                  | <input type="checkbox"/> 1                    | <input type="checkbox"/> 2 | <input type="checkbox"/> 3 | <input type="checkbox"/> 4 | <input type="checkbox"/> 5 | <input type="checkbox"/> 6 | <input type="checkbox"/> 7 | <input type="checkbox"/> 8 | <input type="checkbox"/> 9 | <input type="checkbox"/> 10 |
|                  | Left Rotation (Active w/ Resistance)     | <input type="checkbox"/> 1                    | <input type="checkbox"/> 2 | <input type="checkbox"/> 3 | <input type="checkbox"/> 4 | <input type="checkbox"/> 5 | <input type="checkbox"/> 6 | <input type="checkbox"/> 7 | <input type="checkbox"/> 8 | <input type="checkbox"/> 9 | <input type="checkbox"/> 10 |
|                  | Right Rotation (Passive)                 | <input type="checkbox"/> 1                    | <input type="checkbox"/> 2 | <input type="checkbox"/> 3 | <input type="checkbox"/> 4 | <input type="checkbox"/> 5 | <input type="checkbox"/> 6 | <input type="checkbox"/> 7 | <input type="checkbox"/> 8 | <input type="checkbox"/> 9 | <input type="checkbox"/> 10 |
|                  | Right Rotation (Active)                  | <input type="checkbox"/> 1                    | <input type="checkbox"/> 2 | <input type="checkbox"/> 3 | <input type="checkbox"/> 4 | <input type="checkbox"/> 5 | <input type="checkbox"/> 6 | <input type="checkbox"/> 7 | <input type="checkbox"/> 8 | <input type="checkbox"/> 9 | <input type="checkbox"/> 10 |
|                  | Right Rotation (Active w/Resistance)     | <input type="checkbox"/> 1                    | <input type="checkbox"/> 2 | <input type="checkbox"/> 3 | <input type="checkbox"/> 4 | <input type="checkbox"/> 5 | <input type="checkbox"/> 6 | <input type="checkbox"/> 7 | <input type="checkbox"/> 8 | <input type="checkbox"/> 9 | <input type="checkbox"/> 10 |
|                  | Shoulder Shrug (Active)                  | <input type="checkbox"/> 1                    | <input type="checkbox"/> 2 | <input type="checkbox"/> 3 | <input type="checkbox"/> 4 | <input type="checkbox"/> 5 | <input type="checkbox"/> 6 | <input type="checkbox"/> 7 | <input type="checkbox"/> 8 | <input type="checkbox"/> 9 | <input type="checkbox"/> 10 |
|                  | Shoulder Shrug (Active w/Resistance )    | <input type="checkbox"/> 1                    | <input type="checkbox"/> 2 | <input type="checkbox"/> 3 | <input type="checkbox"/> 4 | <input type="checkbox"/> 5 | <input type="checkbox"/> 6 | <input type="checkbox"/> 7 | <input type="checkbox"/> 8 | <input type="checkbox"/> 9 | <input type="checkbox"/> 10 |
| CN XII           | Tongue Protrusion (Midline)              | <input type="checkbox"/> 1                    | <input type="checkbox"/> 2 | <input type="checkbox"/> 3 | <input type="checkbox"/> 4 | <input type="checkbox"/> 5 | <input type="checkbox"/> 6 | <input type="checkbox"/> 7 | <input type="checkbox"/> 8 | <input type="checkbox"/> 9 | <input type="checkbox"/> 10 |
|                  | Tongue Protrusion (Left)                 | <input type="checkbox"/> 1                    | <input type="checkbox"/> 2 | <input type="checkbox"/> 3 | <input type="checkbox"/> 4 | <input type="checkbox"/> 5 | <input type="checkbox"/> 6 | <input type="checkbox"/> 7 | <input type="checkbox"/> 8 | <input type="checkbox"/> 9 | <input type="checkbox"/> 10 |
|                  | Tongue Protrusion (Right)                | <input type="checkbox"/> 1                    | <input type="checkbox"/> 2 | <input type="checkbox"/> 3 | <input type="checkbox"/> 4 | <input type="checkbox"/> 5 | <input type="checkbox"/> 6 | <input type="checkbox"/> 7 | <input type="checkbox"/> 8 | <input type="checkbox"/> 9 | <input type="checkbox"/> 10 |

**eTable 4.** Rationale for subject withdrawal from study.

| <b>Withdraw Reason</b>                   | <b>Counts</b> |
|------------------------------------------|---------------|
| <b>By Self</b>                           | <b>16</b>     |
| Device issues                            | 1             |
| Did not like sound of device             | 1             |
| Increase in tinnitus                     | 4             |
| No benefit                               | 1             |
| General unrelated to study participation | 9             |
| <b>By Team</b>                           | <b>10</b>     |
| Did not follow study team instruction    | 1             |
| Increase in tinnitus                     | 2             |
| Lost to follow-up                        | 1             |
| Medication disqualifier                  | 1             |
| Neurological Twitch Comorbidity          | 1             |
| Pulsatile Tinnitus                       | 2             |
| Unblinded                                | 1             |
| Major dental surgery                     | 1             |
| <b>Grand Total</b>                       | <b>26</b>     |

**eTable 5.** Rate of Adverse Events (AEs) were not significantly different between Active vs Sham.

| AE (#)            | Non-severe | Severe   | Total/Phase | Related   | Unrelated | Total/Phase |
|-------------------|------------|----------|-------------|-----------|-----------|-------------|
| Post-screen       | 2          | 0        | 2           | 0         | 2         | 2           |
| Active            | 32         | 0        | 32          | 9         | 23        | 32          |
| Active W/O        | 16         | 0        | 16          | 2         | 14        | 16          |
| Control           | 24         | 2        | 26          | 6         | 20        | 26          |
| Control W/O       | 21         | 1        | 22          | 1         | 21        | 22          |
| PSM               | 3          | 0        | 3           | 0         | 3         | 3           |
| <b>Total/Type</b> | <b>98</b>  | <b>3</b> | <b>101</b>  | <b>18</b> | <b>83</b> | <b>101</b>  |

Adverse Events (AEs) (*mild, moderate, and severe*) and device-relatedness (*0: unrelated; 1: probably unrelated; 2: potentially related; 3: probably related, and 4: related*) were scored by the clinical study members at the time of the event while blinded to active vs control status. Conflicted study members were prohibited from discussing AE severity or relatedness.

No serious AEs occurred during this clinical trial. Of 101 total AEs reported by 60 subjects, 3 AEs were classified as severe, all of which occurred during the Control or Control-Washout time periods. 18 AEs from 15 subjects were considered at least potentially associated with the treatment. The number of treatment-related AEs was not significantly different between Active/Active-washout (n=11) and Control/Control-Washout (n=7) periods ( $p=0.182$ ,  $\chi^2$  test of proportions). AEs related to the subject's tinnitus were closely monitored. Subjects were removed from the study if their tinnitus loudness and TFI increased significantly for two consecutive weeks. Contextual factors, such as medication changes or external sound overexposures, were also considered when determining whether an AE was device related.
