# Supplementary material for: Reversing Synchronized Brain Circuits Using Targeted Auditory-Somatosensory Stimulation to Treat Phantom Percepts: A Randomized Clinical Trial
Source: PubMed Central journal article supplement (PMC10238951; doi:10.1001/jamanetworkopen.2023.15914), 2023-06-02
Supplement: jamanetwopen-e2315914-s003.pdf [file jamanetwopen-e2315914-s003.pdf]

## Data Sharing Statement

Jones. Reversing Synchronized Brain Circuits Using Targeted Auditory-Somatosensory Stimulation to Treat Phantom Percepts. *JAMA Netw Open*. Published June 02, 2023. doi:10.1001/jamanetworkopen.2023.15914

### Data

**Data available:** Yes

**Data types:** Deidentified participant data, Data dictionary

**How to access data:** [sushore@umich.edu](mailto:sushore@umich.edu); [damartel@umich.edu](mailto:damartel@umich.edu)

**When available:** With publication

### Supporting Documents

**Document types:** Statistical/analytic code, Informed consent form

**How to access documents:** [sushore@umich.edu](mailto:sushore@umich.edu); [damartel@umich.edu](mailto:damartel@umich.edu) (These were uploaded with the original submission) URL will be available on publication

**When available:** With publication

### Additional Information

**Who can access the data:** Those with an interest - academic or clinical researchers

**Types of analyses:** For future research

**Mechanisms of data availability:** with signed data access agreement
